# Supplementary figures and images for: Characterization of a Novel PolyM-Preferred Alginate Lyase from Marine Vibrio splendidus OU02
Source: MDPI journal article supplement (doi:10.3390/md16090295), 2018-08-22

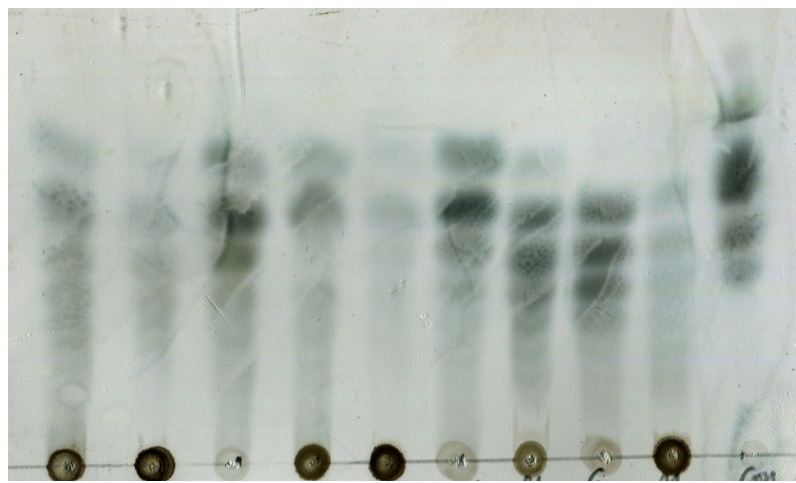

DP2

DP3

DP4

DP5

Supplement: s1 [file s1]

**A**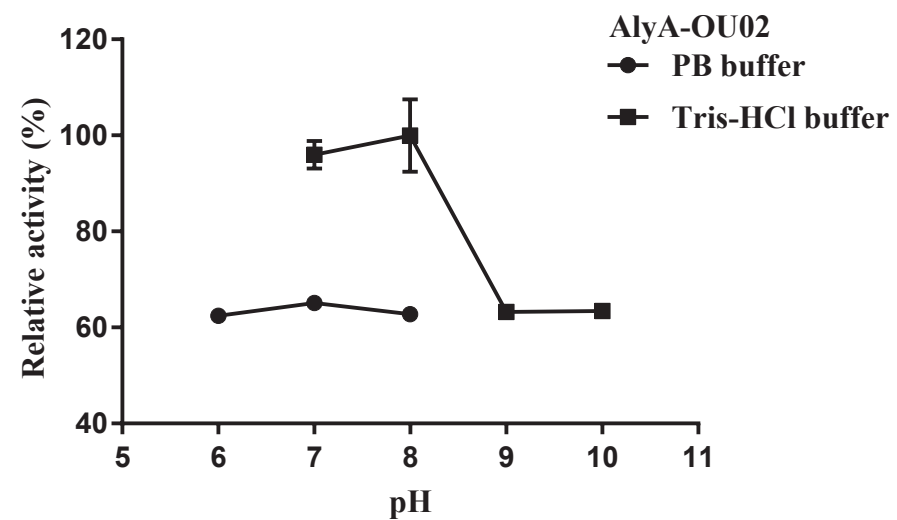**B**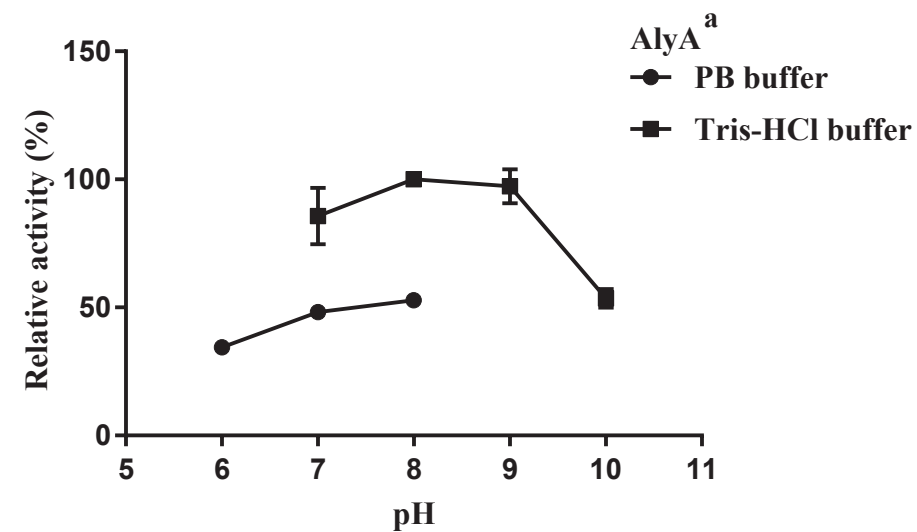**C**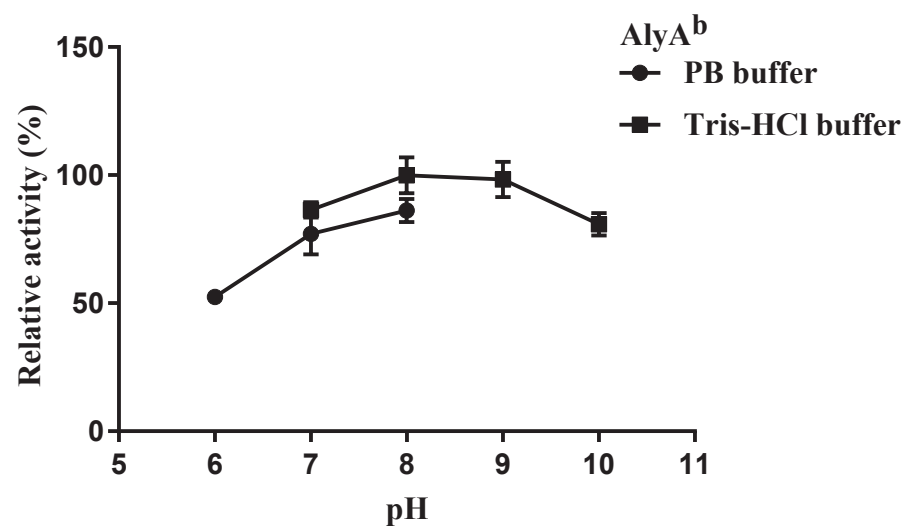

Supplement: s1 [file s1]

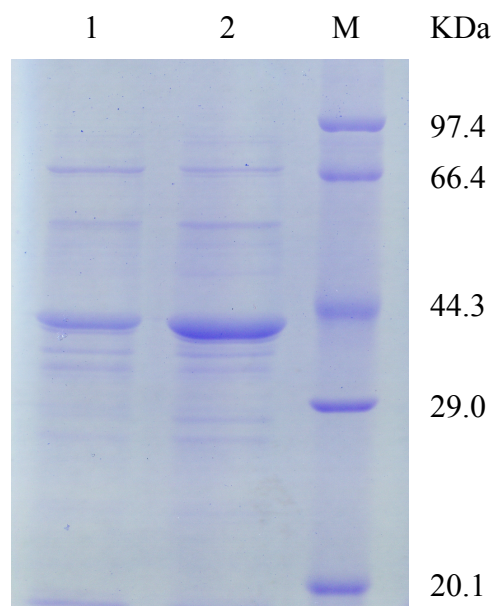

Supplement: s1 [file s1]

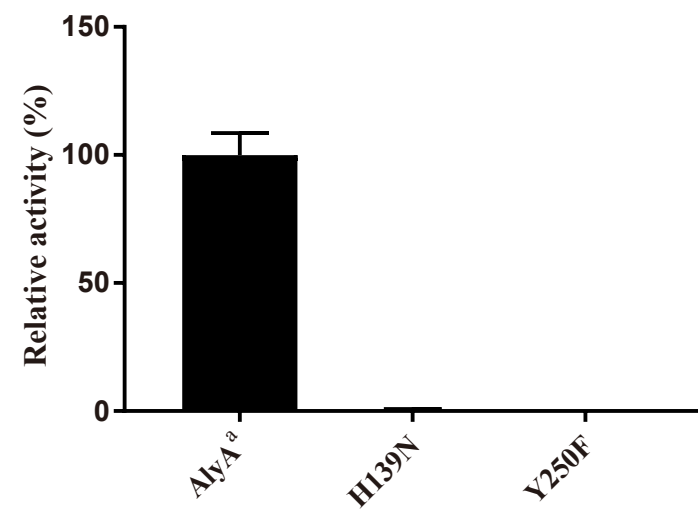

Supplement: s1 [file s1]
